# Supplementary material for: Highly reactive heterogeneous Heck and hydrogenation catalysts constructed through ‘bottom-up’ nanoparticle self-assemblyElectronic supplementary information (ESI) available: experimental methods. See http://www.rsc.org/suppdata/cc/b2/b200334a/
Source: Royal Society of Chemistry journal article supplement (doi:10.1039/b200334a), 2002-04-16
Supplement: b200334a.doc [file b200334a.doc]

# Supplementary data

Highly Reactive Heterogeneous Heck and Hydrogenation Catalysts Constructed Using Bottom-up Self-Assembly

Trent H. Galow, Ulf Drechsler, Jarrod A. Hanson and Vincent M. Rotello*

Department of Chemistry, University of Massachusetts, Amherst, Massachusetts 01003

Experimental Methods

Silica colloids (15 nm: dispersed in MeOH at 30% w/v) were obtained from Nissan Chemicals as a free sample, and used as received. All reagents used were purchased from Aldrich Chemical Company and used as received. All solvents were purchased as spectrophotometric grade and used as received. Thin layer chromatography (TLC) and column chromatography were carried out on glass precoated TLC plates with silica gel 60 and silica gel 60 (230-400 mesh), respectively. All 1H NMR spectra (200 MHz) were recorded using either CDCl3 or d6-DMSO as solvent. IR spectra were recorded using KBr pellets on a MIDAC 1200 FTIR spectrometer. Synthesis of carboxylic acid-functionalized silica Colloids 2, and amine polymer 3 have been reported previously. See reference 3.

Synthesis of Carboxylic Acid-Functionalized Pd Colloids (Pd-MMPC1)

To a 125 mL Erlenmeyer flask was added potassium tetrachloropalladate (II) (K2PdCl4)(200 mg, 0.612) and dissolved in 20 mL H2O. In a separate Erlenmeyer, tetraoctylammonium bromide (2.2 g, 4.023 mmol) was dissolved in 60 mL toluene. After combining the solutions, phase transfer occurred. 1-octanethiol (107 L, 0.734 mmol) was injected to a small vial, then dissolved in 6 mL toluene. The solution was added to the biphasic mixture and stirred for a further 5 minutes upon which a reddish/orange color formed. Afterwards, sodium borohydride (462 mg, 0.121 mmol) was dissolved in 4 mL H2O, then added to the bipahsic mixture. Immediately, effervescence and a color change (black) were observed. The reaction was stirred for three hours after which the contents were transferred to a separatory funnel and the toluene layer collected. Toluene was removed by rotary evaporation at 50ºC. 4 mL toluene was added to the black solid, followed by 250 mL acetonitrile, upon which some precipitation was seen. The suspension was placed in the freezer for at least one night. The black solid was filtered, washed with cold acetonitrile, and dissolved in CH2Cl2, Finally, the solution was filtered to remove insoluble aggregates and placed onto rotary evaporator to remove solvent, after which the solid was put onto a high vacuum apparatus overnight.

Into a purged 250 mL RB flask was added 11-mercaptoundecanoic acid (380 mg, 1.74 mmol) and dissolved in 75 mL toluene. Then, octanethiol-functionalized Pd nsnopsrticles (380 mg) were dissolved in 25 mL toluene, then added to the RB flask to initiate place-exchange. The reaction was stirred overnight at 50ºC under an Ar atmosphere. The solvent was removed *in vacuo* and CH2Cl2 was rinsed over the precipitate. The rinsing was performed three to four additional times. Then, MeOH was used to dissolve the precipitate Pd-MMPC1. The insoluble aggregates were filtered off, after which the filtrate was placed onto the rotary evaporator to remove solvent, and put onto a high vacuum apparatus overnight.

Preparation of Precalcinated Aggregates

1 was dissolved in MeOH to 2.4% w/v, while 2 and 4 were dissolved in DMF to 12 and 6% w/v, respectively. The 1/1/1, 1/1/3 and 1/1/5 Pd-MMPC1; SiO2-CO2H 2, poly-NH2 3 precalcinated ternary systems with approximately 1.6% Pd (after calcination), were prepapred by diluting 1.15 mL 1, 1 mL 2, and 1 mL 3 with 1.39 mL MeOH, 5 mL of DMF, and 5 mL of DMF, respectively. Then 2 and 3 were combined in a 50 mL centrifuge tube and left to aggregate for 30 minutes. Afterwards, 1 was added to the 2.3 aggregate system and the left to sit overnight during which further aggregation took place. Then, diethyl ether was added to ensure full precipitation of the composite, after which it sedimented at the bottom of the flask. The ether/ DMF was decanted off, and additional ether was added, then decanted until the DMF was removed. The ternary systems were prepared in a similar manner, except for using 1/1/1, 1/1/3, 1/1/5 ratios of 3/1/4 respectively, and replacing ether with MeOH in the work-up.

Preparation of Calcinated Catalysts

The 1/1, and 1/1/1, 1,1,3 and 1/1/5 aggregate systems were transferred to small crucibles. The MeOH was slowly evaporated using a low temperature oven. After the samples were dry, they were transferred to a controlled temperature oven. The following temperature program provided the calcinated catalysts which were finally ground to a fine powder. Temp 1= 20ºC, time 1 = 9 h; temp 2=500 ºC, time 2 = 3 h; temp 3=20 ºC, time 3 = 2 h; time 4 = 0 (off). Elemental analysis showed that the systems contained 1.6 % Pd.

Hydrogenation of 9-Decenol

Into a 100 mL RB flask was placed 10 mg of the appropriate catalyst followed by the addition of MeOH (40 mL). After fitting a reflux condenser, the catalyst was activated by heating to 20 ºC in an H2 atmosphere (1 atm), for about one hour (or until the Pd had turned dark). After removing the condenser and cooling to room temp., dodecane (0.65 mL, 2.86 mmol) as an internal standard was added (while still under H2). Then, 9-decen-1-ol ( 1 mL, 5.61 mmol) was injected at time zero, after which 0.1 mL samples were extracted at different intervals and analyzed by GC.

Heck Reaction Using 1/1/5 Catalyst

To a pressure tube was added the desired bromoarene (5 mmol) and dissolved in 12 mL toluene. To this solution, was added styrene (0.86 mL, 7.5 mmol), tributylamine (1.31 mL, 5.5 mmol) and 15 mg 1/1/5 Pd catalyst. The reaction was heated at 145 ºC, until comlplete (by TLC) or stopped after 3 days. After cooling to room temperature, the tube contents were added to 20mL 2N HCl solution and transferred to a separatory funnel. The organic layer was collected and washed with 20 mL H20, and separated once more. Then, the combined aqueous layers were backwashed with toluene, and the toluene layers combined, dried over sodium sulfate and filtered. The solvent was removed *in vacuo* and placed onto a high vacuum apparatus overnight. The nitroarene products were purified by column chromatography using the solvent gradient: 4/1 to 2/1 hexane/ethyl acetate.

Proton NMR Spectrum of Octanethiol-functionalized Pd Colloids

IR Spectrum of Carboxylic acid-functionalized Pd Colloids (Pd-MMPC1)
